# Supplementary figures and images for: First-in-human Use of a Microsurgical Robotic System for Central Lymphatic Reconstruction
Source: PubMed Central journal article supplement — Plast Reconstr Surg Glob Open. 2023 Dec 19;11(12):e5484. doi: 10.1097/GOX.0000000000005484 (PMC10730044; doi:10.1097/gox.0000000000005484), 2023-12-19

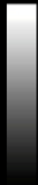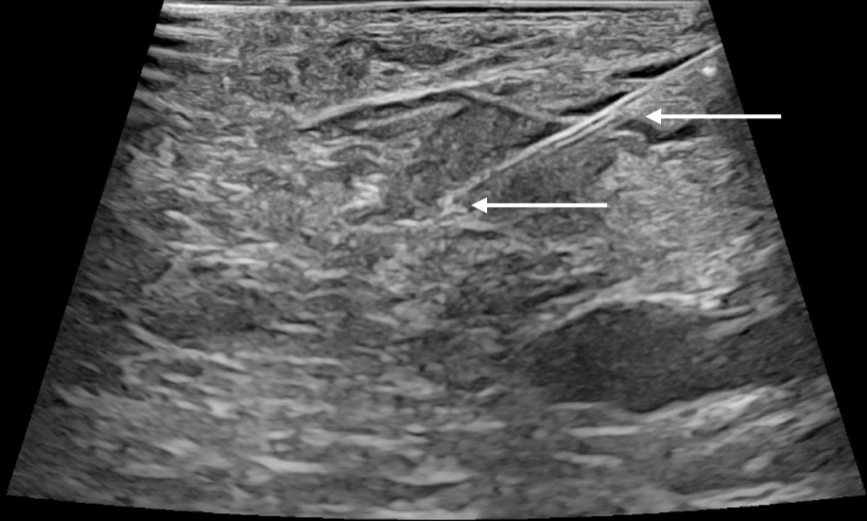

Supplement: gox-11-e5484-s002.pdf [file gox-11-e5484-s002.pdf]

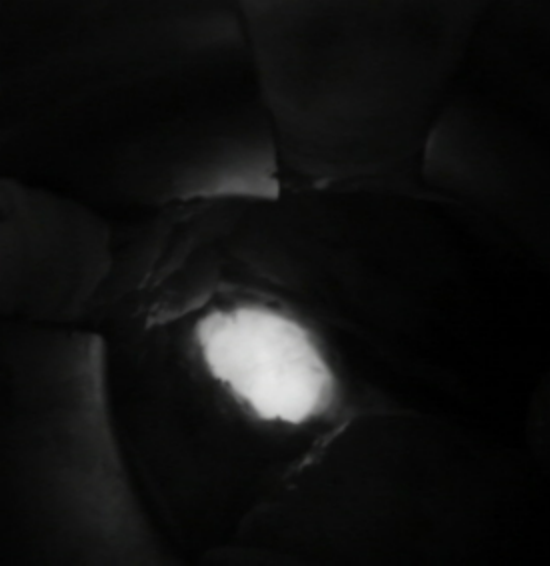

Supplement: gox-11-e5484-s003.pdf [file gox-11-e5484-s003.pdf]
